# Supplementary material for: Diversity of Volatile Aroma Compound Composition Produced by Non-Saccharomyces Yeasts in the Early Phase of Grape Must Fermentation
Source: Foods. 2022 Oct 5;11(19):3088. doi: 10.3390/foods11193088 (PMC9563004; doi:10.3390/foods11193088)
Supplement: Supplementary file 1 [file foods-11-03088-s001.zip › foods-1901690-supplementary.pdf]

# Diversity of volatile aroma compound composition produced by non-*Saccharomyces* yeasts in early phase of grape must fermentation

Doris Delač Salopek <sup>1</sup>, Ivana Horvat <sup>1</sup>, Ana Hranilović <sup>2</sup>, Tomislav Plavša <sup>1</sup>, Sanja Radeka <sup>1</sup>, Igor Pasković <sup>1</sup>, Igor Lukić <sup>1,3,\*</sup>

<sup>1</sup> Institute of agriculture and tourism, Karla Huguesa 8, Poreč 52440, Croatia

<sup>2</sup> Department of Wine Science, The University of Adelaide, Urrbrae, SA, 5064, Australia

<sup>3</sup> Centre of Excellence for Biodiversity and Molecular Plant Breeding, Svetošimunska 25, 10000 Zagreb, Croatia

\* Correspondence: igor@iptpo.hr; Tel.: 0038552408327

## Supplementary Materials

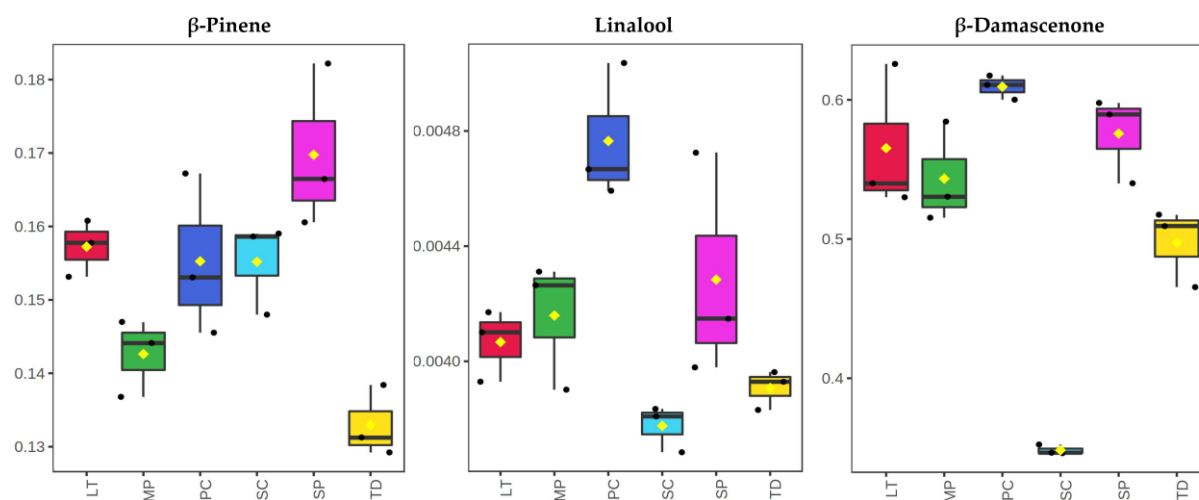

**Figure S1.** Concentrations of selected monoterpenes and C<sub>13</sub>-norisoprenoids with high differentiating ability among yeasts (high *F*-ratios) identified in the early phase of fermentation of Malvazija istarska grape must inoculated by *Saccharomyces cerevisiae* and five non-*Saccharomyces* yeasts. Abbreviations: SC – *Saccharomyces cerevisiae*; TD – *Torulaspora delbrueckii*; MP – *Metschnikowia pulcherrima*; PC – *Pichia kluyveri*; LT – *Lachancea thermotolerans*; SP – *Schizosaccharomyces pombe*.

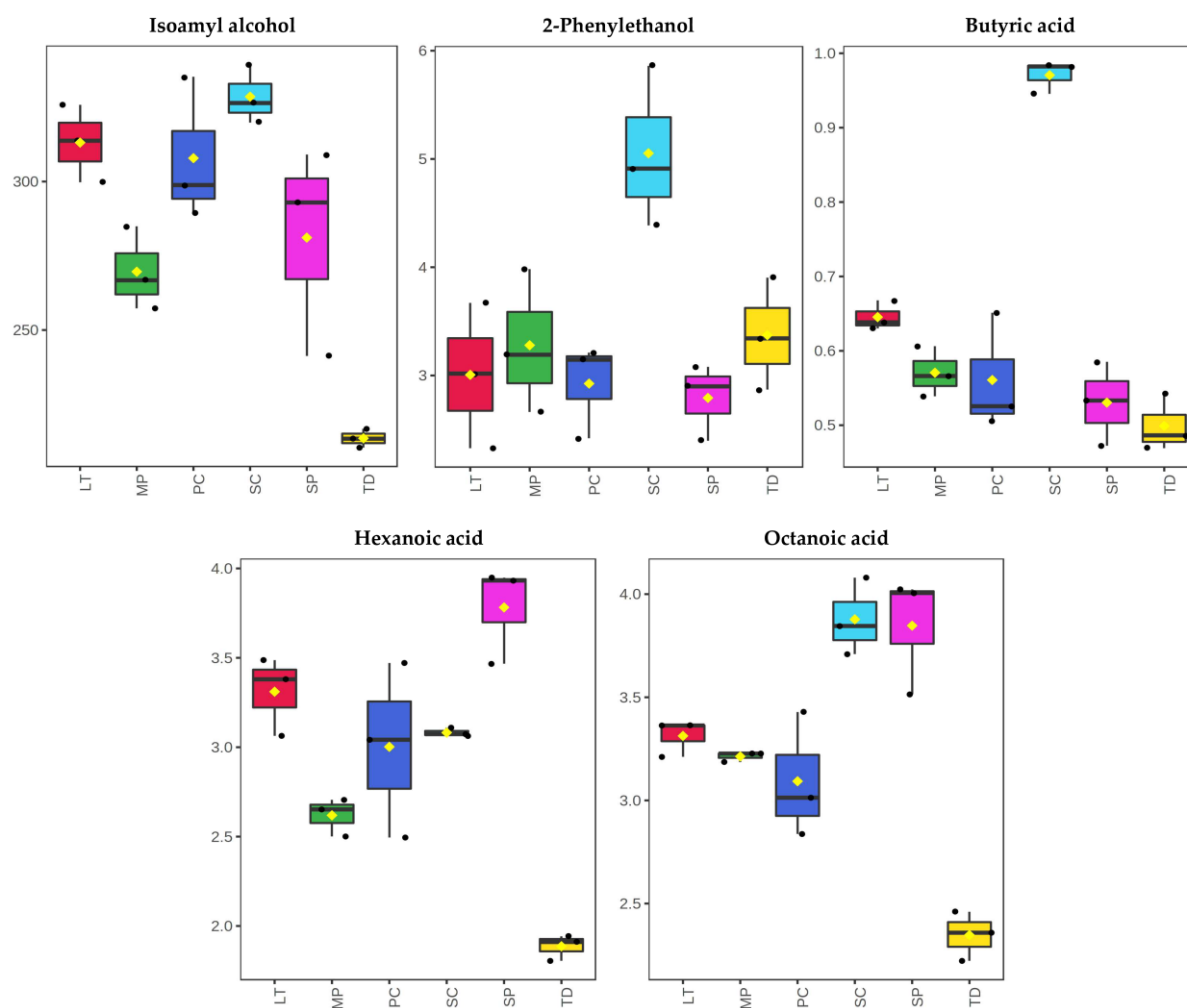

**Figure S2.** Concentrations of selected alcohols and acids with high differentiating ability among yeasts (high  $F$ -ratios) identified in the early phase of fermentation of Malvazija istarska grape must inoculated by *Saccharomyces cerevisiae* and five non-*Saccharomyces* yeasts. Abbreviations: SC – *Saccharomyces cerevisiae*; TD – *Torulaspora delbrueckii*; MP – *Metschnikowia pulcherrima*; PC – *Pichia kluyveri*; LT – *Lachancea thermotolerans*; SP – *Schizosaccharomyces pombe*.

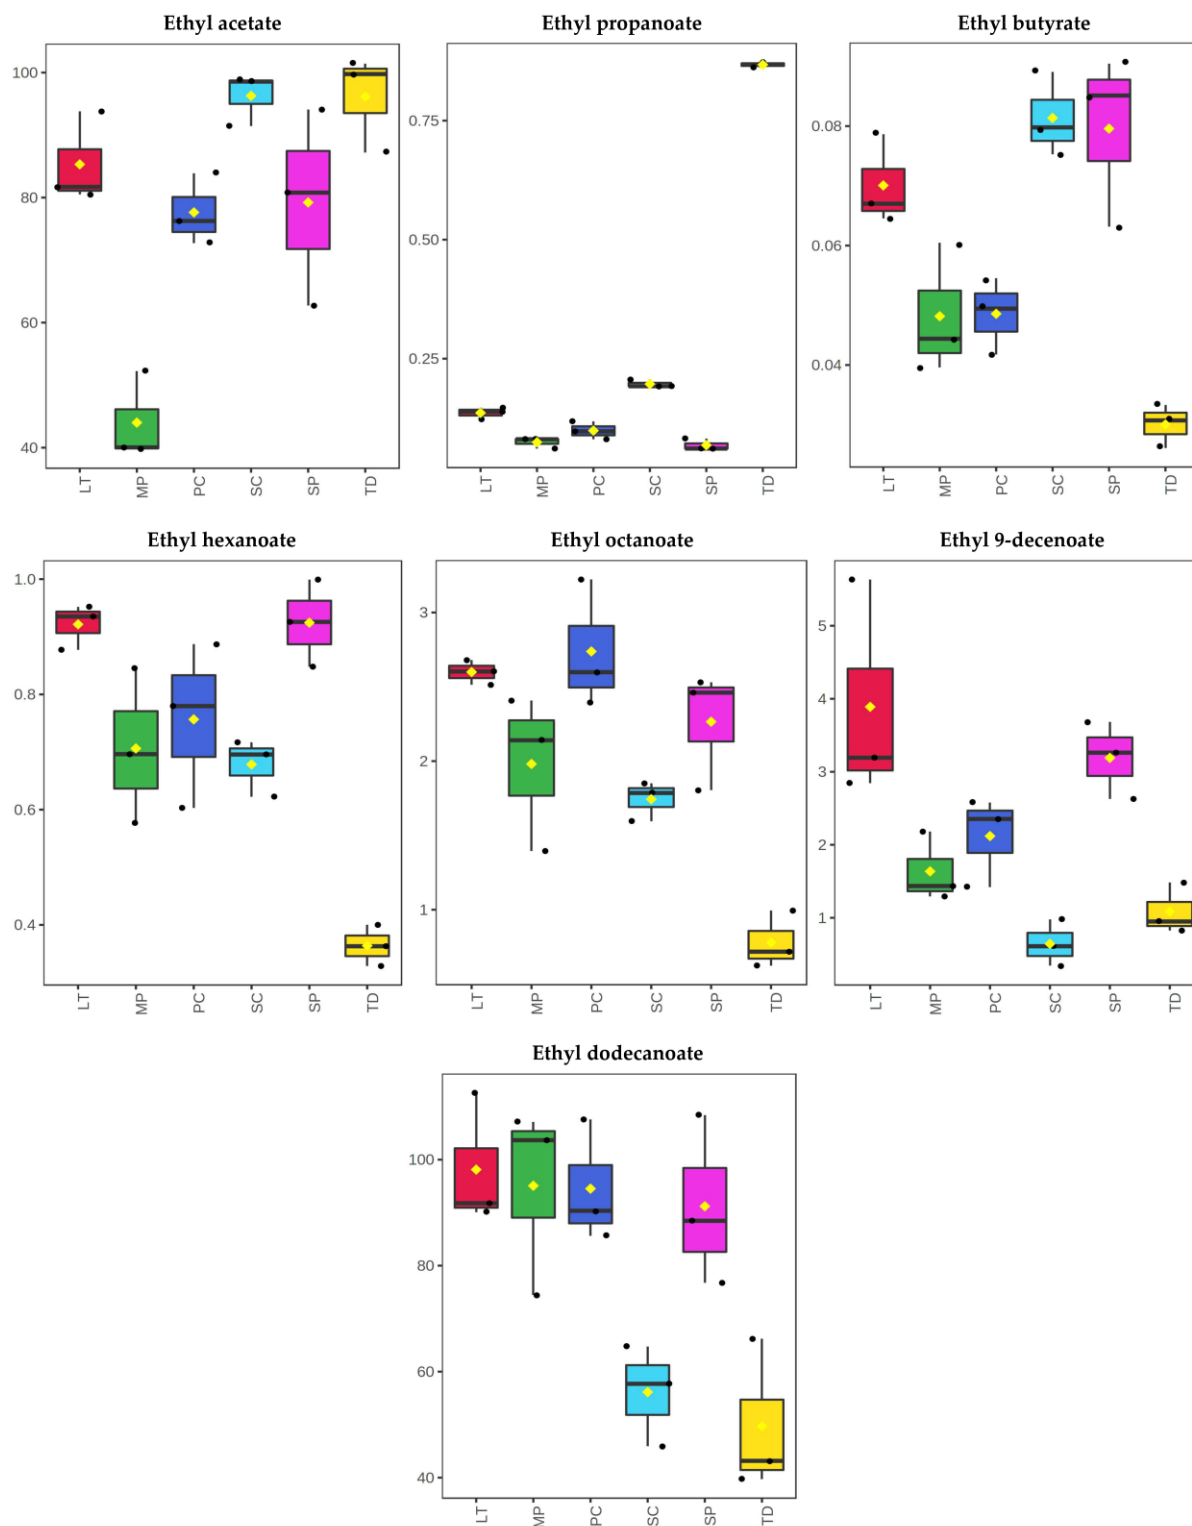

**Figure S3.** Concentrations of ethyl esters with high differentiating ability among yeasts (high  $F$ -ratios) identified in the early phase of fermentation of Malvazija istarska grape must inoculated by *Saccharomyces cerevisiae* and five non-*Saccharomyces* yeasts. Abbreviations: SC – *Saccharomyces cerevisiae*; TD – *Torulaspora delbrueckii*; MP – *Metschnikowia pulcherrima*; PC – *Pichia kluyveri*; LT – *Lachancea thermotolerans*; SP – *Schizosaccharomyces pombe*.

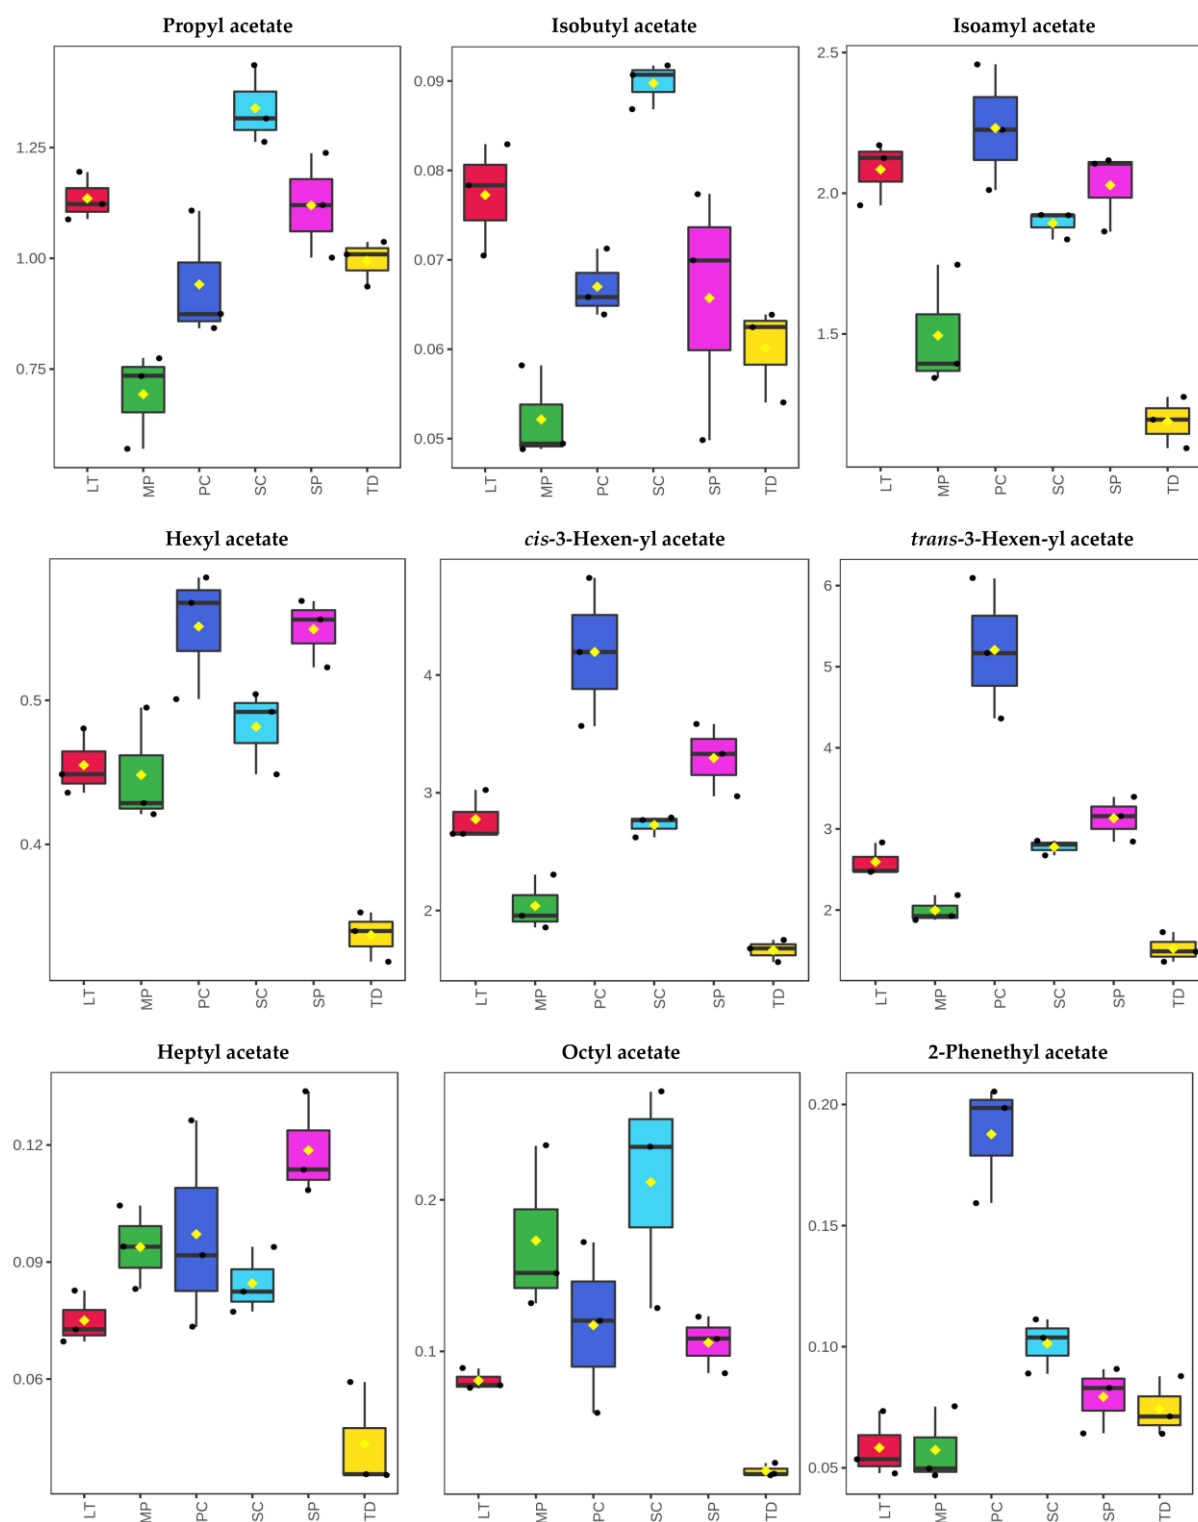

**Figure S4.** Concentrations of acetate esters with high differentiating ability among yeasts (high  $F$ -ratios) identified in the early phase of fermentation of Malvazija istarska grape must inoculated by *Saccharomyces cerevisiae* and five non-*Saccharomyces* yeasts. Abbreviations: SC – *Saccharomyces cerevisiae*; TD – *Torulaspora delbrueckii*; MP – *Metschnikowia pulcherrima*; PC – *Pichia kluyveri*; LT – *Lachancea thermotolerans*; SP – *Schizosaccharomyces pombe*.

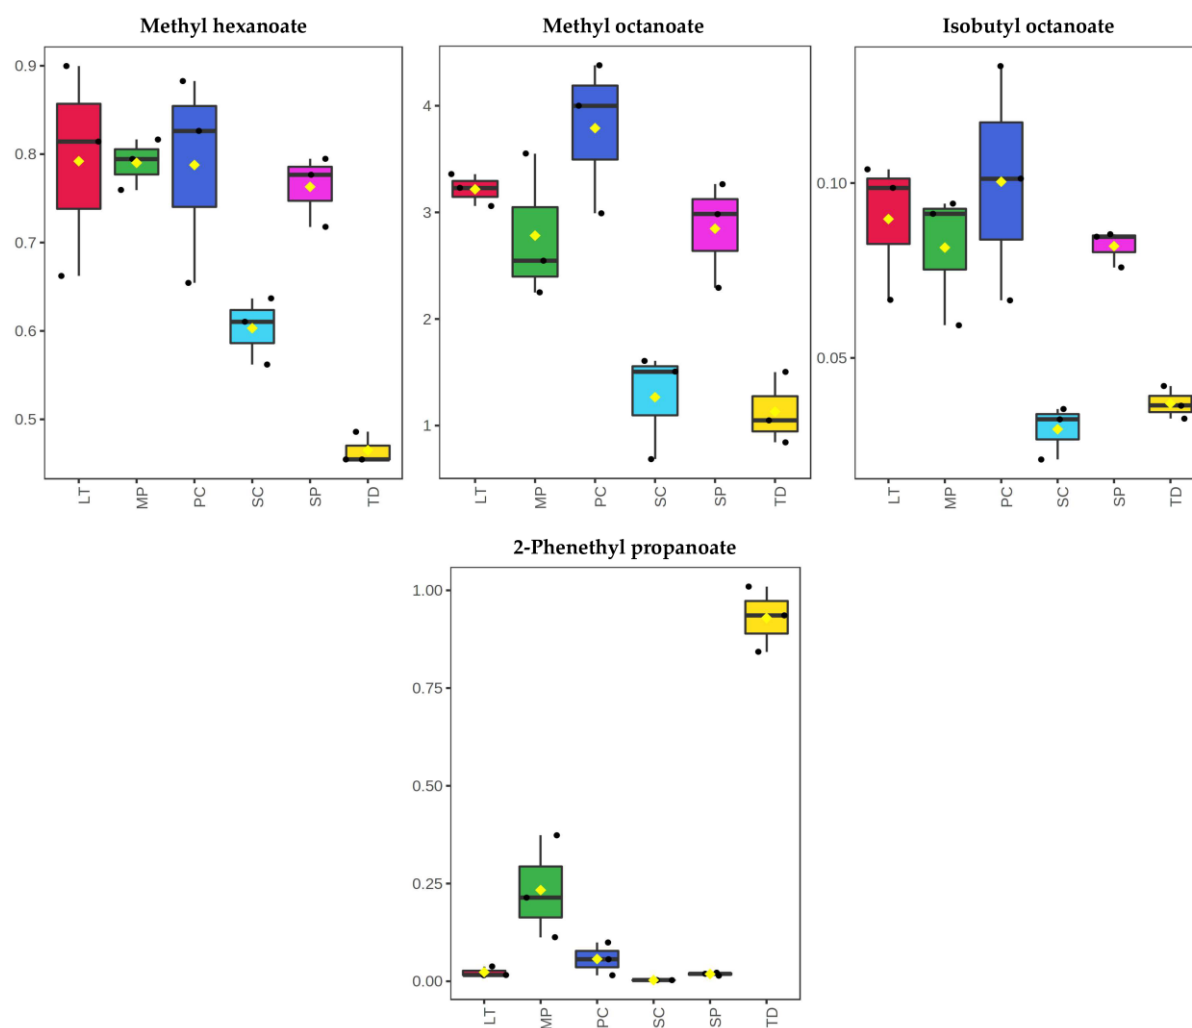

**Figure S5.** Concentrations of other esters with high differentiating ability among yeasts (high  $F$ -ratios) identified in the early phase of fermentation of Malvazija istarska grape must inoculated by *Saccharomyces cerevisiae* and five non-*Saccharomyces* yeasts. Abbreviations: SC – *Saccharomyces cerevisiae*; TD – *Torulaspora delbrueckii*; MP – *Metschnikowia pulcherrima*; PC – *Pichia kluyveri*; LT – *Lachancea thermotolerans*; SP – *Schizosaccharomyces pombe*.

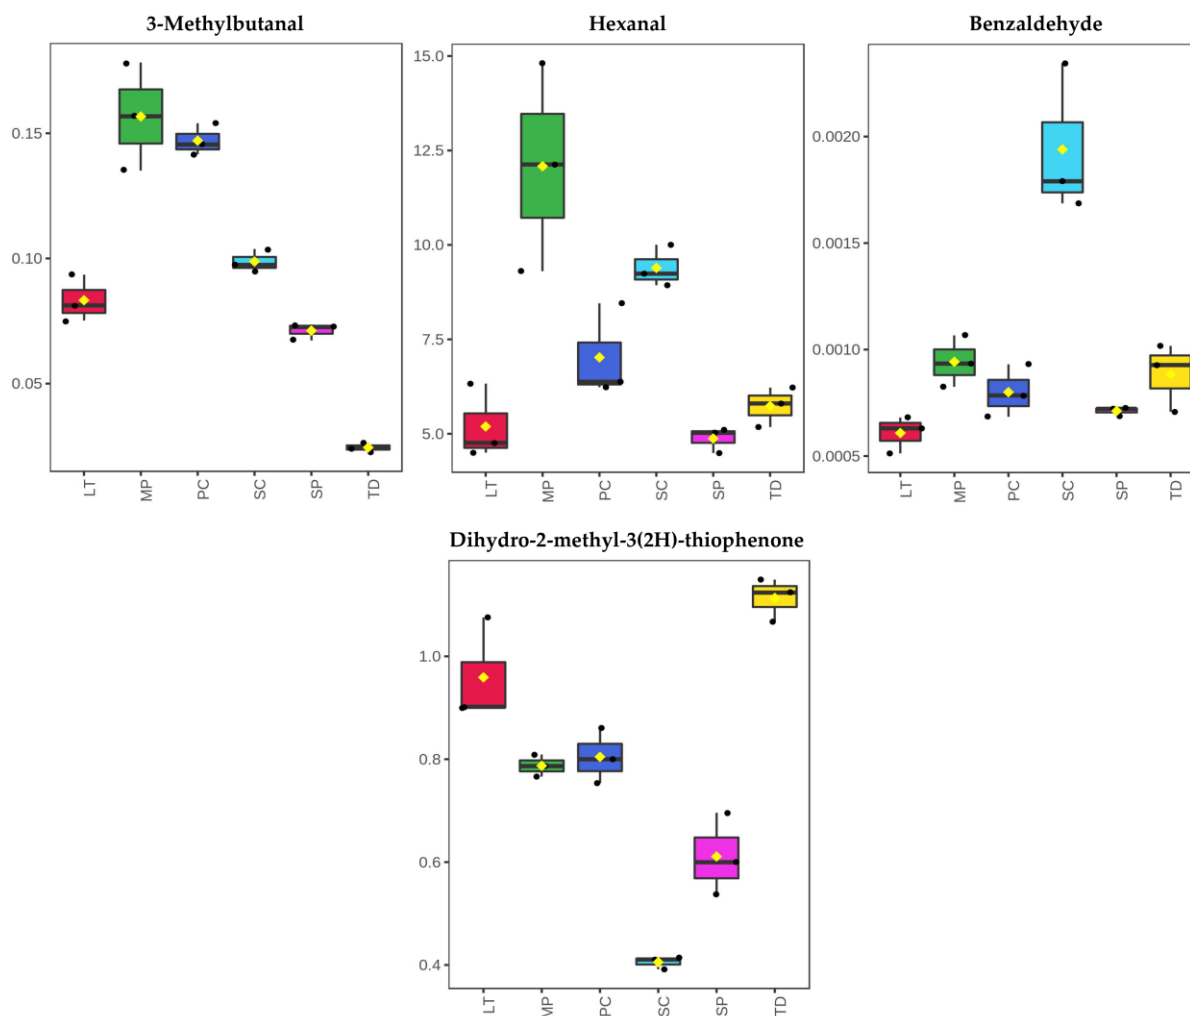

**Figure S6.** Concentrations of miscellaneous volatile compounds with high differentiating ability among yeasts (high *F*-ratios) identified in the early phase of fermentation of Malvazija istarska grape must inoculated by *Saccharomyces cerevisiae* and five non-*Saccharomyces* yeasts. Abbreviations: SC – *Saccharomyces cerevisiae*; TD – *Torulaspora delbrueckii*; MP – *Metschnikowia pulcherrima*; PC – *Pichia kluyveri*; LT – *Lachancea thermotolerans*; SP – *Schizosaccharomyces pombe*.
